# Supplementary material
Source: PubMed Central journal article supplement (PMC3934652)
Supplement: NIHMS542970-supplement-Supplemental_Material.pdf [file NIHMS542970-supplement-Supplemental_Material.pdf]

## SUPPLEMENTAL MATERIAL

### Supplement I

| TEE large # of bubbles (vs. not large #) |                                                  |            |            |            |            |            |            |            | Cochran-Armitage test of trend | Generalized mixed model test of linear trend                                                                                                                                          |
|------------------------------------------|--------------------------------------------------|------------|------------|------------|------------|------------|------------|------------|--------------------------------|---------------------------------------------------------------------------------------------------------------------------------------------------------------------------------------|
| Database                                 | % with factor (overall and by point score group) |            |            |            |            |            |            |            |                                |                                                                                                                                                                                       |
|                                          | ALL                                              | 0-3        | 4          | 5          | 6          | 7          | 8          | 9-10       |                                |                                                                                                                                                                                       |
| ALL                                      | <b>64%</b>                                       | <b>52%</b> | <b>58%</b> | <b>60%</b> | <b>70%</b> | <b>68%</b> | <b>66%</b> | <b>68%</b> | <b>0.0021</b>                  | <b>0.6415</b>                                                                                                                                                                         |
| CODICIA                                  | <b>74%</b>                                       | 75%        | 91%        | 77%        | 82%        | 68%        | 61%        | 71%        | 0.0412                         | ** Generalized mixed model test of linear trend over 7 ordered categories (site included as random effect)<br><br>p-value =0.7239 if raw score is used OR=1.013 (95% CI 0.941, 1.091) |
| French PFO/ASA                           | <b>82%</b>                                       |            | 50%        | 82%        | 86%        | 86%        | 80%        | 76%        | 0.5115                         |                                                                                                                                                                                       |
| APRIS                                    | <b>23%</b>                                       | 0%         | 20%        | 40%        |            |            |            |            | 0.188                          |                                                                                                                                                                                       |
| Bern                                     | <b>66%</b>                                       | 80%        | 65%        | 61%        | 73%        | 66%        | 64%        | 50%        | 0.2956                         |                                                                                                                                                                                       |
| PICSS                                    | <b>40%</b>                                       | 33%        | 33%        | 58%        | 45%        | 33%        | 38%        | 43%        | 0.8812                         |                                                                                                                                                                                       |
| Lausanne                                 | <b>47%</b>                                       | 50%        | 50%        | 0%         | 100%       | 0%         | 50%        | 67%        | 0.5971                         |                                                                                                                                                                                       |
| Toronto                                  |                                                  |            |            |            |            |            |            |            |                                |                                                                                                                                                                                       |
| Tufts                                    | <b>52%</b>                                       | 43%        | 40%        | 47%        | 60%        | 60%        | 80%        | 40%        | 0.1218                         |                                                                                                                                                                                       |
| German                                   | <b>56%</b>                                       | 41%        | 59%        | 54%        | 61%        | 57%        | 53%        | 74%        | 0.1646                         |                                                                                                                                                                                       |

TEE characteristic of large # of bubbles (vs. not large #) across RoPE Score strata. Results are presented in aggregate and also by component database.

| TEE shunt at rest (vs. no shunt) |                                                  |            |            |            |            |            |            |            | Cochran-Armitage test of trend | Generalized mixed model test of linear trend                                                                                                                                          |
|----------------------------------|--------------------------------------------------|------------|------------|------------|------------|------------|------------|------------|--------------------------------|---------------------------------------------------------------------------------------------------------------------------------------------------------------------------------------|
| Database                         | % with factor (overall and by point score group) |            |            |            |            |            |            |            |                                |                                                                                                                                                                                       |
|                                  | ALL                                              | 0-3        | 4          | 5          | 6          | 7          | 8          | 9-10       |                                |                                                                                                                                                                                       |
| ALL                              | <b>70%</b>                                       | <b>77%</b> | <b>68%</b> | <b>74%</b> | <b>70%</b> | <b>70%</b> | <b>68%</b> | <b>62%</b> | <b>0.0987</b>                  | <b>p=.7678</b>                                                                                                                                                                        |
| CODICIA                          |                                                  |            |            |            |            |            |            |            |                                | ** Generalized mixed model test of linear trend over 7 ordered categories (site included as random effect)<br><br>p-value =0.8094 if raw score is used OR=1.012 (95% CI 0.916, 1.120) |
| French PFO/ASA                   | <b>60%</b>                                       |            | 50%        | 67%        | 55%        | 61%        | 64%        | 57%        | 0.9022                         |                                                                                                                                                                                       |
| APRIS                            | <b>90%</b>                                       | 100%       | 100%       | 80%        |            |            |            |            | 0.3448                         |                                                                                                                                                                                       |
| Bern                             | <b>62%</b>                                       | 56%        | 63%        | 54%        | 60%        | 71%        | 70%        | 50%        | 0.4574                         |                                                                                                                                                                                       |
| PICSS                            | <b>74%</b>                                       | 78%        | 67%        | 58%        | 84%        | 80%        | 77%        | 71%        | 0.5353                         |                                                                                                                                                                                       |
| Lausanne                         | <b>47%</b>                                       | 100%       | 100%       | 0%         | 0%         | 50%        | 75%        | 0%         | 0.1912                         |                                                                                                                                                                                       |
| Toronto                          |                                                  |            |            |            |            |            |            |            |                                |                                                                                                                                                                                       |
| Tufts                            | <b>79%</b>                                       | 78%        | 64%        | 82%        | 81%        | 94%        | 69%        | 80%        | 0.6142                         |                                                                                                                                                                                       |
| German                           | <b>81%</b>                                       | 81%        | 71%        | 92%        | 81%        | 79%        | 78%        | 100%       | 0.4766                         |                                                                                                                                                                                       |

TEE characteristic of shunt at rest (vs. no shunt) across RoPE Score strata. Results are presented in aggregate and also by component database.

| Hypermobile septum (vs. no hypermobile septum) |                                                  |            |            |            |            |            |            |            | Cochran-Armitage test of trend | Generalized mixed model test of linear trend                                                                                                                                                   |
|------------------------------------------------|--------------------------------------------------|------------|------------|------------|------------|------------|------------|------------|--------------------------------|------------------------------------------------------------------------------------------------------------------------------------------------------------------------------------------------|
| Database                                       | % with factor (overall and by point score group) |            |            |            |            |            |            |            |                                |                                                                                                                                                                                                |
|                                                | ALL                                              | 0-3        | 4          | 5          | 6          | 7          | 8          | 9-10       |                                |                                                                                                                                                                                                |
| ALL                                            | <b>25%</b>                                       | <b>27%</b> | <b>27%</b> | <b>29%</b> | <b>26%</b> | <b>26%</b> | <b>21%</b> | <b>20%</b> | <b>0.0325</b>                  | <b>p=.0802</b>                                                                                                                                                                                 |
| CODICIA                                        | <b>43%</b>                                       | 56%        | 41%        | 37%        | 45%        | 53%        | 33%        | 35%        | 0.3955                         | ** Generalized mixed model test of linear trend over 7 ordered categories (site included as random effect)<br><br>p-value= <b>0.0420</b> if raw score is used<br>OR=0.93 (95% CI 0.860, 0.997) |
| French PFO/ASA                                 | <b>19%</b>                                       |            | 0%         | 15%        | 23%        | 20%        | 20%        | 16%        | 0.8678                         |                                                                                                                                                                                                |
| APRIS                                          | <b>13%</b>                                       | 0%         | 17%        | 17%        |            |            |            |            | 0.5425                         |                                                                                                                                                                                                |
| Bern                                           | <b>21%</b>                                       | 20%        | 29%        | 11%        | 23%        | 31%        | 14%        | 20%        | 0.9858                         |                                                                                                                                                                                                |
| PICSS                                          | <b>15%</b>                                       | 11%        | 6%         | 42%        | 20%        | 7%         | 9%         | 14%        | 0.8154                         |                                                                                                                                                                                                |
| Lausanne                                       | <b>47%</b>                                       | 0%         | 100%       | 60%        | 33%        | 100%       | 40%        | 14%        | 0.3597                         |                                                                                                                                                                                                |
| Toronto                                        | <b>24%</b>                                       | 50%        | 38%        | 36%        | 29%        | 17%        | 19%        | 17%        | 0.0324                         |                                                                                                                                                                                                |
| Tufts                                          | <b>27%</b>                                       | 33%        | 17%        | 33%        | 27%        | 7%         | 33%        | 40%        | 0.7912                         |                                                                                                                                                                                                |
| German                                         | <b>22%</b>                                       | 19%        | 29%        | 31%        | 19%        | 21%        | 14%        | 21%        | 0.2287                         |                                                                                                                                                                                                |

TEE characteristic of hypermobile septum (vs. no hypermobile septum) across RoPE Score strata. Results are presented in aggregate and also by component database.

| TEE combination #1 – hypermobile septum AND large # of bubbles |                                                  |     |     |     |     |     |     |      | Cochran-Armitage test of trend | Generalized mixed model test of linear trend                                                                                                                                                 |
|----------------------------------------------------------------|--------------------------------------------------|-----|-----|-----|-----|-----|-----|------|--------------------------------|----------------------------------------------------------------------------------------------------------------------------------------------------------------------------------------------|
| Database                                                       | % with factor (overall and by point score group) |     |     |     |     |     |     |      |                                |                                                                                                                                                                                              |
|                                                                | ALL                                              | 0-3 | 4   | 5   | 6   | 7   | 8   | 9-10 |                                |                                                                                                                                                                                              |
| ALL                                                            | 15%                                              | 16% | 14% | 13% | 19% | 17% | 13% | 12%  | 0.5207                         | ** Generalized mixed model test of linear trend over 7 ordered categories (site included as random effect)<br><br>p-value= <b>0.4229</b> if raw score is used<br>OR=0.96 (95% CI 0.87, 1.06) |
| CODICIA                                                        | 36%                                              | 50% | 41% | 27% | 42% | 39% | 24% | 35%  | 0.2642                         |                                                                                                                                                                                              |
| French PFO/ASA                                                 | 16%                                              | .   | 0%  | 0%  | 23% | 19% | 17% | 9%   | 0.6301                         |                                                                                                                                                                                              |
| APRIS                                                          | 13%                                              | 0%  | 17% | 17% | .   | .   | .   | .    | 0.5425                         |                                                                                                                                                                                              |
| Bern                                                           | 17%                                              | 20% | 24% | 4%  | 20% | 28% | 14% | 0%   | 0.6678                         |                                                                                                                                                                                              |
| PICSS                                                          | 6%                                               | 0%  | 0%  | 25% | 5%  | 0%  | 8%  | 14%  | 0.477                          |                                                                                                                                                                                              |
| Lausanne                                                       | 4%                                               | 0%  | 50% | 0%  | 0%  | 0%  | 0%  | 0%   | 0.2091                         |                                                                                                                                                                                              |
| Toronto                                                        | 0%                                               | 0%  | 0%  | 0%  | 0%  | 0%  | 0%  | 0%   |                                |                                                                                                                                                                                              |
| Tufts                                                          | 13%                                              | 24% | 0%  | 11% | 15% | 0%  | 20% | 20%  | 0.6738                         |                                                                                                                                                                                              |
| German                                                         | 9%                                               | 0%  | 7%  | 15% | 10% | 8%  | 6%  | 16%  | 0.3424                         |                                                                                                                                                                                              |

TEE composite of hypermobile septum AND large # of bubbles across RoPE Score strata. Results are presented in aggregate and also by component database.

| TEE – VERY large # of bubbles (vs. not very large number or small #) |                                                  |     |     |     |      |     |     |      | Cochran-Armitage test of trend | Generalized mixed model test of linear trend                                                                                                                                                 |
|----------------------------------------------------------------------|--------------------------------------------------|-----|-----|-----|------|-----|-----|------|--------------------------------|----------------------------------------------------------------------------------------------------------------------------------------------------------------------------------------------|
| Database                                                             | % with factor (overall and by point score group) |     |     |     |      |     |     |      |                                |                                                                                                                                                                                              |
|                                                                      | ALL                                              | 0-3 | 4   | 5   | 6    | 7   | 8   | 9-10 |                                |                                                                                                                                                                                              |
| ALL                                                                  | 44%                                              | 35% | 38% | 41% | 51%  | 48% | 44% | 48%  | 0.0237                         | <b>p=.6621</b>                                                                                                                                                                               |
| CODICIA                                                              | 74%                                              | 75% | 91% | 77% | 82%  | 68% | 61% | 71%  | 0.0412                         | ** Generalized mixed model test of linear trend over 7 ordered categories (site included as random effect)<br><br>p-value= <b>0.9067</b> if raw score is used<br>OR=1.01 (95% CI 0.93, 1.08) |
| French PFO/ASA                                                       | 52%                                              | .   | 25% | 45% | 59%  | 57% | 53% | 42%  | 0.4184                         |                                                                                                                                                                                              |
| APRIS                                                                | 15%                                              | 0%  | 20% | 20% | .    | .   | .   | .    | 0.489                          |                                                                                                                                                                                              |
| Bern                                                                 | 48%                                              | 60% | 47% | 43% | 43%  | 45% | 55% | 50%  | 0.9167                         |                                                                                                                                                                                              |
| PICSS                                                                | 29%                                              | 33% | 11% | 42% | 35%  | 27% | 23% | 43%  | 0.5412                         |                                                                                                                                                                                              |
| Lausanne                                                             | 20%                                              | 0%  | 50% | 0%  | 100% | 0%  | 25% | 0%   | 0.7191                         |                                                                                                                                                                                              |
| Toronto                                                              | .                                                | .   | .   | .   | .    | .   | .   | .    |                                |                                                                                                                                                                                              |
| Tufts                                                                | 16%                                              | 19% | 0%  | 6%  | 10%  | 20% | 30% | 40%  | 0.1296                         |                                                                                                                                                                                              |
| German                                                               | 32%                                              | 17% | 29% | 31% | 41%  | 35% | 17% | 53%  | 0.1858                         |                                                                                                                                                                                              |

TEE characteristic of VERY large # of bubbles (vs. not very large number or small #) across RoPE Score strata. Results are presented in aggregate and also by component database.

| TEE -Composite #3 small (not large) # bubbles AND hypermobile septum |                                                  |           |           |            |           |           |           |           | Cochran-Armitage test of trend | Generalized mixed model test of linear trend                                                                                                                                                 |
|----------------------------------------------------------------------|--------------------------------------------------|-----------|-----------|------------|-----------|-----------|-----------|-----------|--------------------------------|----------------------------------------------------------------------------------------------------------------------------------------------------------------------------------------------|
|                                                                      | % with factor (overall and by point score group) |           |           |            |           |           |           |           |                                |                                                                                                                                                                                              |
| Database                                                             | ALL                                              | 0-3       | 4         | 5          | 6         | 7         | 8         | 9-10      |                                |                                                                                                                                                                                              |
| ALL                                                                  | <b>6%</b>                                        | <b>9%</b> | <b>9%</b> | <b>10%</b> | <b>5%</b> | <b>6%</b> | <b>3%</b> | <b>3%</b> | 0.0009                         | <b>p=.0753</b>                                                                                                                                                                               |
| CODICIA                                                              | <b>7%</b>                                        | 6%        | 0%        | 10%        | 3%        | 13%       | 9%        | 0%        | 0.6431                         | ** Generalized mixed model test of linear trend over 7 ordered categories (site included as random effect)<br><br>p-value= <b>0.0527</b> if raw score is used<br>OR=0.88 (95% CI 0.77, 1.00) |
| French PFO/ASA                                                       | <b>1%</b>                                        | .         | 0%        | 8%         | 0%        | 0%        | 1%        | 0%        | 0.2837                         |                                                                                                                                                                                              |
| APRIS                                                                | <b>0%</b>                                        | 0%        | 0%        | 0%         | .         | .         | .         | .         |                                |                                                                                                                                                                                              |
| Bern                                                                 | <b>5%</b>                                        | 0%        | 6%        | 7%         | 3%        | 3%        | 0%        | 20%       | 0.4691                         |                                                                                                                                                                                              |
| PICSS                                                                | <b>9%</b>                                        | 11%       | 6%        | 17%        | 15%       | 7%        | 0%        | 0%        | 0.3228                         |                                                                                                                                                                                              |
| Lausanne                                                             | <b>13%</b>                                       | 0%        | 50%       | 33%        | 0%        | 100%      | 0%        | 0%        | 0.2566                         |                                                                                                                                                                                              |
| Toronto                                                              | <b>0%</b>                                        | 0%        | 0%        | 0%         | 0%        | 0%        | 0%        | 0%        |                                |                                                                                                                                                                                              |
| Tufts                                                                | <b>9%</b>                                        | 10%       | 17%       | 15%        | 0%        | 0%        | 0%        | 20%       | 0.317                          |                                                                                                                                                                                              |
| German                                                               | <b>11%</b>                                       | 16%       | 14%       | 11%        | 8%        | 13%       | 6%        | 5%        | 0.1232                         |                                                                                                                                                                                              |

TEE composite of small (not large) # bubbles AND hypermobile septum across RoPE Score strata. Results are presented in aggregate and also by component database.

| TEE -Composite #4 small /medium # bubbles (not very large) AND hypermobile septum |                                                  |            |            |            |           |           |           |           | Cochran-Armitage test of trend | Generalized mixed model test of linear trend                                                                                                                                                 |
|-----------------------------------------------------------------------------------|--------------------------------------------------|------------|------------|------------|-----------|-----------|-----------|-----------|--------------------------------|----------------------------------------------------------------------------------------------------------------------------------------------------------------------------------------------|
| Database                                                                          | % with factor (overall and by point score group) |            |            |            |           |           |           |           |                                |                                                                                                                                                                                              |
|                                                                                   | ALL                                              | 0-3        | 4          | 5          | 6         | 7         | 8         | 9-10      |                                |                                                                                                                                                                                              |
| ALL                                                                               | <b>9%</b>                                        | <b>10%</b> | <b>12%</b> | <b>12%</b> | <b>8%</b> | <b>9%</b> | <b>5%</b> | <b>7%</b> | 0.0128                         | <b>p=.3004</b>                                                                                                                                                                               |
| CODICIA                                                                           | <b>7%</b>                                        | 6%         | 0%         | 10%        | 3%        | 13%       | 9%        | 0%        | 0.6431                         | ** Generalized mixed model test of linear trend over 7 ordered categories (site included as random effect)<br><br>p-value= <b>0.2556</b> if raw score is used<br>OR=0.93 (95% CI 0.83, 1.04) |
| French PFO/ASA                                                                    | <b>4%</b>                                        | .          | 0%         | 8%         | 5%        | 3%        | 3%        | 8%        | 0.6772                         |                                                                                                                                                                                              |
| APRIS                                                                             | <b>7%</b>                                        | 0%         | 0%         | 17%        | .         | .         | .         | .         | 0.2685                         |                                                                                                                                                                                              |
| Bern                                                                              | <b>9%</b>                                        | 0%         | 18%        | 7%         | 13%       | 10%       | 0%        | 20%       | 0.8213                         |                                                                                                                                                                                              |
| PICSS                                                                             | <b>10%</b>                                       | 11%        | 6%         | 25%        | 15%       | 7%        | 0%        | 0%        | 0.2693                         |                                                                                                                                                                                              |
| Lausanne                                                                          | <b>13%</b>                                       | 0%         | 50%        | 33%        | 0%        | 100%      | 0%        | 0%        | 0.2566                         |                                                                                                                                                                                              |
| Toronto                                                                           | <b>0%</b>                                        | 0%         | 0%         | 0%         | 0%        | 0%        | 0%        | 0%        |                                |                                                                                                                                                                                              |
| Tufts                                                                             | <b>15%</b>                                       | 14%        | 17%        | 21%        | 15%       | 0%        | 20%       | 20%       | 0.8422                         |                                                                                                                                                                                              |
| German                                                                            | <b>14%</b>                                       | 17%        | 20%        | 11%        | 10%       | 19%       | 8%        | 10%       | 0.3332                         |                                                                                                                                                                                              |

TEE composite of small /medium # bubbles (not very large) AND hypermobile septum across RoPE Score strata. Results are presented in aggregate and also by component database.

## Supplement II

|                                       | All PFO patients<br>with at least some<br>TEE data<br><br>(n=1294) | RoPE Score > 6<br><br>(n=637) | RoPE Score ≤ 6<br><br>(n=657) | p-value ** |
|---------------------------------------|--------------------------------------------------------------------|-------------------------------|-------------------------------|------------|
| <b>TEE findings*</b>                  |                                                                    |                               |                               |            |
| Large # bubbles (vs. not large)       | 64.4% (695/1079)                                                   | 67.4% (347/515)               | 61.7% (348/564)               | 0.5286     |
| Shunt at rest (vs. no shunt)          | 69.6% (484/695)                                                    | 67.6% (238/352)               | 71.7% (246/343)               | 0.4474     |
| Hypermobile septum (vs. not)          | 25.3% (320/1265)                                                   | 23.0% (144/626)               | 27.5% (176/639)               | 0.1063     |
| <b>Sensitivity analyses</b>           |                                                                    |                               |                               |            |
| Combo #1: Large & Hyper (vs not)      | 15.1% (182/1206)                                                   | 14.5% (86/595)                | 15.7% (96/611)                | 0.4661     |
| Combo #2:                             | ( n=1062)                                                          | (n=509)                       | (n=553)                       | 0.2021     |
| Not large AND Not hypermobile         | 28.7% (305)                                                        | 27.7% (141)                   | 29.7% ( 164)                  |            |
| Large OR hypermobile                  | 54.1% (575)                                                        | 55.4% (282)                   | 53.0% (293)                   |            |
| VERY Large # bubbles (vs. rest)       | 44.4% (479/1079)                                                   | 46.4% (239/515)               | 42.6% (240/564)               | 0.5793     |
| Comb #3: Not large & hypermobile      | 6.0% (72/1209)                                                     | 4.2% (25/597)                 | 7.7% (47/612)                 | 0.2373     |
| Comb #4: Not Very large & hypermobile | 8.6% (104/1204)                                                    | 6.9% (41/597)                 | 10.4% (63/607)                | 0.3210     |

Large represents size of shunt defined as > 10 bubbles. Very large represents an uncountable number of bubbles (too large). Hypermobile represents to ≥ 10 mm of excursion of the interatrial septum. \*Repeated from Table 3, \*\* p-values from generalized mixed models (TEE Variables ONLY) adjusting for random site effect, with logit link for all binary TEE outcomes and cumulative logit for TEE combo #2 (ordered) 3-level variable.
